# Supplementary material
Source: Springer Nature journal article supplement (https://www.springermedizin.de/resource/supplementary/12958_2008_484_MOESM7_ESM.pdf/9568056)

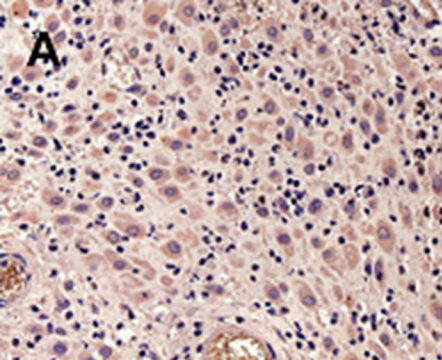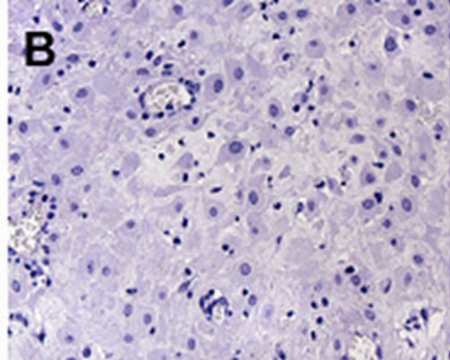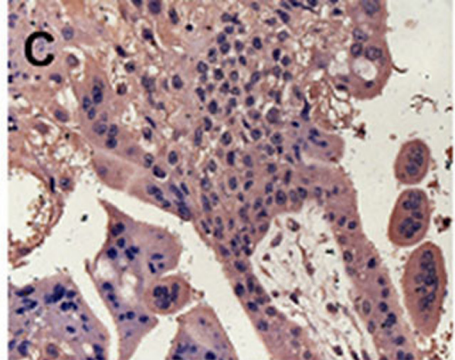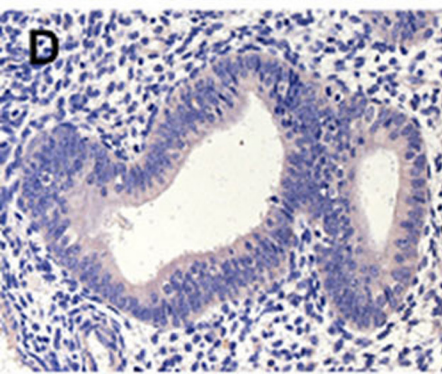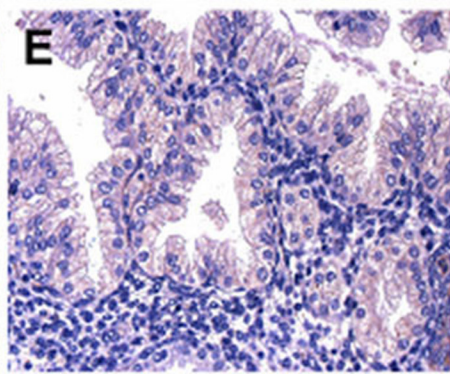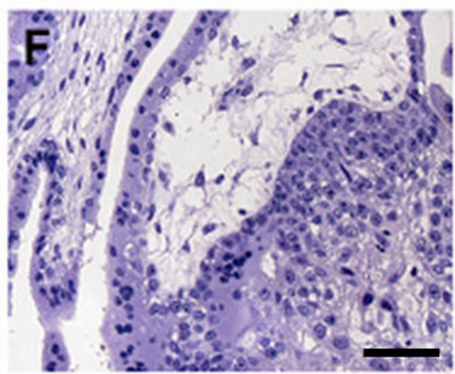

Supplement: MOESM7 [file 9568056]
